# Supplementary material
Source: PubMed Central journal article supplement (PMC1955307)

## Appendix

Figure A-1: Distribution of Employees by Retirement Year

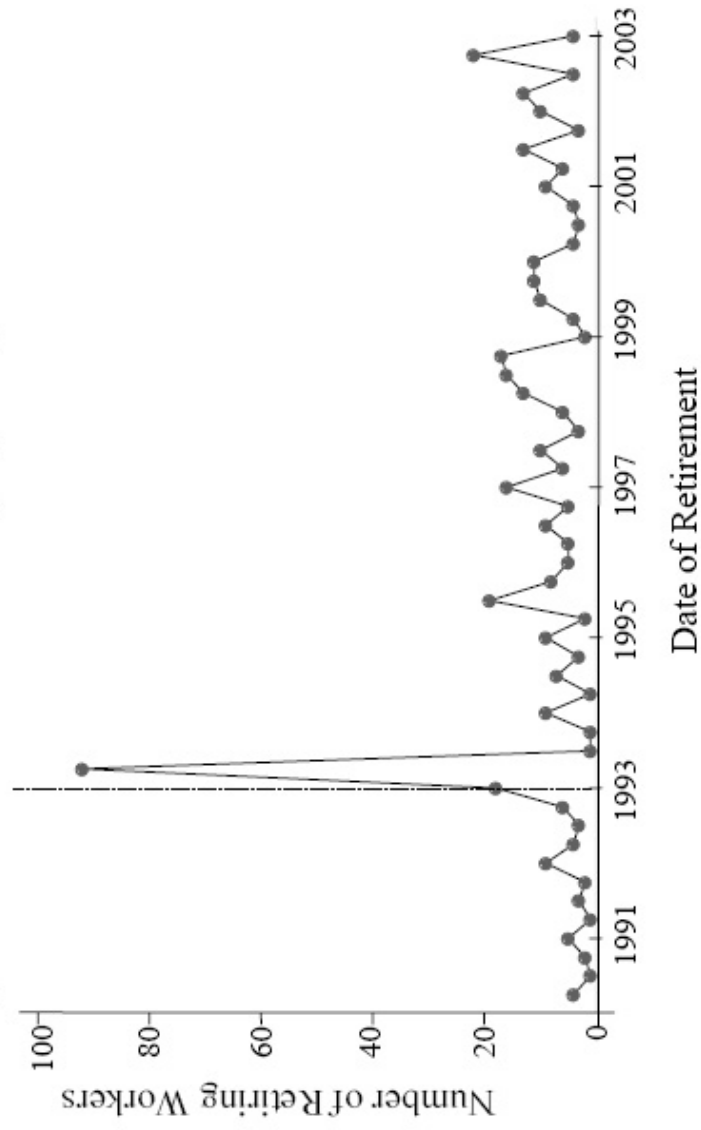

Supplement: hesr0041-2054-fs1.pdf [file hesr0041-2054-fs1.pdf]
